# Supplementary material
Source: ML conference proceedings conference paper supplement (https://proceedings.mlr.press/v70/suzumura17a.html)
Supplement: Supplementary file 1 [file suzumura17a-supp.pdf]

## A. Proofs

### A.1. Proof of Lemma 1

*Proof.* In the following, we abbreviate  $j$  in Lemma 1 for the simplicity of the notation unless there is no confusion, and prove the lemma in slightly general case of  $V[\mathbf{y}] = \Sigma$ . To prove the lemma, we first state the polyhedral lemma in Lee et al. (2016) as follows:

**Lemma 7** (Polyhedral Lemma; (Lee et al., 2016)). *Suppose  $\mathbf{y} \sim N(\boldsymbol{\mu}, \Sigma)$ . Let  $\mathbf{c} = \Sigma\boldsymbol{\eta}(\boldsymbol{\eta}^\top \Sigma \boldsymbol{\eta})^{-1}$  for any  $\boldsymbol{\eta} \in \mathbb{R}^n$ , and let  $\mathbf{z} = (I_n - \mathbf{c}\boldsymbol{\eta}^\top)\mathbf{y}$ . Then we have*

$$\begin{aligned} \text{Pol}(S) &= \{\mathbf{y} \in \mathbb{R}^n \mid A\mathbf{y} \leq \mathbf{b}\} \\ &= \left\{ \mathbf{y} \in \mathbb{R}^n \mid \begin{array}{l} L(S, \mathbf{z}) \leq \boldsymbol{\eta}^\top \mathbf{y} \leq U(S, \mathbf{z}), \\ N(S, \mathbf{z}) \geq 0 \end{array} \right\}, \end{aligned}$$

where

$$L(S, \mathbf{z}) = \max_{j:(A\mathbf{c})_j < 0} \frac{b_j - (A\mathbf{z})_j}{(A\mathbf{c})_j}, \quad (13a)$$

$$U(S, \mathbf{z}) = \min_{j:(A\mathbf{c})_j > 0} \frac{b_j - (A\mathbf{z})_j}{(A\mathbf{c})_j} \quad (13b)$$

and  $N(S, \mathbf{z}) = \max_{j:(A\mathbf{c})_j = 0} b_j - (A\mathbf{z})_j$ . In addition,  $(L(S, \mathbf{z}), U(S, \mathbf{z}), N(S, \mathbf{z}))$  is independent of  $\boldsymbol{\eta}^\top \mathbf{y}$ .

The polyhedral lemma allows us to construct a pivotal quantity as a truncated normal distribution, that is, for any  $\mathbf{z}$ , we have

$$[F_{0, \boldsymbol{\eta}^\top \Sigma \boldsymbol{\eta}}^{[L(S, \mathbf{z}), U(S, \mathbf{z})]}(\boldsymbol{\eta}^\top \mathbf{y}) \mid \mathbf{y} \in \text{Pol}(S)] \sim \text{Unif}(0, 1), \quad (14)$$

where  $\text{Unif}(0, 1)$  denotes the standard (continuous) uniform distribution. In fact, by letting  $\mathbf{z}_0$  be an arbitrary realization of  $\mathbf{z}$ , one can see that

$$\begin{aligned} &[\boldsymbol{\eta}^\top \mathbf{y} \mid \mathbf{y} \in \text{Pol}(S), \mathbf{z} = \mathbf{z}_0] \\ &\stackrel{d}{=} [\boldsymbol{\eta}^\top \mathbf{y} \mid L(S, \mathbf{z}_0) \leq \boldsymbol{\eta}^\top \mathbf{y} \leq U(S, \mathbf{z}_0)] \\ &\sim \text{TN}(\boldsymbol{\eta}^\top \boldsymbol{\mu}, \boldsymbol{\eta}^\top \Sigma \boldsymbol{\eta}, L(S, \mathbf{z}_0), U(S, \mathbf{z}_0)), \end{aligned}$$

where  $\stackrel{d}{=}$  denotes the equality of random variables in distribution. Therefore, probability integral transformation implies

$$[F_{\boldsymbol{\eta}^\top \boldsymbol{\mu}, \boldsymbol{\eta}^\top \Sigma \boldsymbol{\eta}}^{[L(S, \mathbf{z}), U(S, \mathbf{z})]}(\boldsymbol{\eta}^\top \mathbf{y}) \mid \mathbf{y} \in \text{Pol}(S), \mathbf{z} = \mathbf{z}_0]$$

has a uniform distribution  $\text{Unif}(0, 1)$  for any  $\mathbf{z}_0$ . By integrating out  $\mathbf{z}_0$ , the pivotal quantity Eq.(14) holds. In addition, an lower  $\alpha$ -percentile of the distribution can be obtained as

$$q_\alpha = (F_{\boldsymbol{\eta}^\top \boldsymbol{\mu}, \boldsymbol{\eta}^\top \Sigma \boldsymbol{\eta}}^{[L(S, \mathbf{z}), U(S, \mathbf{z})]}(\alpha))^{-1}.$$

In the following, let us denote  $(S, \mathbf{z})$  by  $S$  for shorthand. The remaining is to show that truncation points in Eqs.(13) are equivalent to

$$\begin{aligned} L(S) &= \boldsymbol{\eta}^\top \mathbf{y} + \theta_L \boldsymbol{\eta}^\top \Sigma \boldsymbol{\eta} \quad (15a) \\ \text{where } \theta_L &= \min_{\theta \in \mathbb{R}} \theta \text{ s.t. } \mathbf{y} + \theta \Sigma \boldsymbol{\eta} \in \text{Pol}(S) \end{aligned}$$

and

$$\begin{aligned} U(S) &= \boldsymbol{\eta}^\top \mathbf{y} + \theta_U \boldsymbol{\eta}^\top \Sigma \boldsymbol{\eta} \quad (15b) \\ \text{where } \theta_U &= \max_{\theta \in \mathbb{R}} \theta \text{ s.t. } \mathbf{y} + \theta \Sigma \boldsymbol{\eta} \in \text{Pol}(S), \end{aligned}$$

respectively. Simple calculation shows that, for any  $\theta \in \mathbb{R}$ , we have

$$\begin{aligned} &\mathbf{y} + \theta \Sigma \boldsymbol{\eta} \in \text{Pol}(S) \\ &\Leftrightarrow A(\mathbf{y} + \theta \Sigma \boldsymbol{\eta}) \leq \mathbf{b} \\ &\Leftrightarrow \theta \cdot A \Sigma \boldsymbol{\eta} \leq \mathbf{b} - A\mathbf{y}. \\ &\Leftrightarrow \begin{cases} \theta \leq (\mathbf{b} - A\mathbf{y})_j / (A \Sigma \boldsymbol{\eta})_j, & (A \Sigma \boldsymbol{\eta})_j > 0 \\ \theta \geq (\mathbf{b} - A\mathbf{y})_j / (A \Sigma \boldsymbol{\eta})_j, & (A \Sigma \boldsymbol{\eta})_j < 0 \\ 0 \leq (\mathbf{b} - A\mathbf{y})_j, & (A \Sigma \boldsymbol{\eta})_j = 0 \end{cases}. \end{aligned}$$

On the other hand, by the definition of  $\mathbf{c}$  and  $\mathbf{z}$  in Lemma 7, it is easy to see that

$$L(S) = \boldsymbol{\eta}^\top \mathbf{y} + \boldsymbol{\eta}^\top \Sigma \boldsymbol{\eta} \max_{j:(A \Sigma \boldsymbol{\eta})_j < 0} \frac{(\mathbf{b} - A\mathbf{y})_j}{(A \Sigma \boldsymbol{\eta})_j}$$

Therefore, for each  $j$  such that  $(A \Sigma \boldsymbol{\eta})_j < 0$ , we have

$$\max_{j:(A \Sigma \boldsymbol{\eta})_j < 0} \frac{(\mathbf{b} - A\mathbf{y})_j}{(A \Sigma \boldsymbol{\eta})_j} \leq \theta$$

and thus the minimum possible feasible  $\theta$  would be

$$\begin{aligned} \theta_L &= \min\{\theta \in \mathbb{R} \mid \mathbf{y} + \theta \Sigma \boldsymbol{\eta} \in \text{Pol}(S)\} \\ &= \max_{j:(A \Sigma \boldsymbol{\eta})_j < 0} \frac{(\mathbf{b} - A\mathbf{y})_j}{(A \Sigma \boldsymbol{\eta})_j}. \end{aligned}$$

Similarly, we see that the equivalency of  $U(S)$ .

To complete the proof, let us consider a Gaussian random variable  $\mathbf{y}$  with mean  $X\boldsymbol{\beta}^*$  and covariance matrix  $\sigma^2 I_n$  with some constant  $\sigma^2$ . We can choose  $\boldsymbol{\eta} = (X_S^+)^T \mathbf{e}_j$  for testing the null hypothesis  $H_{0,j} : \beta_{S,j}^* = 0$  for each  $j \in S$ , since  $\boldsymbol{\eta}^\top \mathbf{y}$  reduces to the  $j$ -th element of an ordinary least square estimator for the selected model, and in this case,  $\boldsymbol{\eta}^\top \Sigma \boldsymbol{\eta}$  reduces to

$$\sigma_S^2 = \sigma^2 \|\boldsymbol{\eta}\|^2 = \sigma^2 (X_S^T X_S)_{jj}^{-1}.$$

Then the critical values are computed as

$$\ell_{\alpha/2}^S = q_{\alpha/2} = (F_{0, \sigma_S^2}^{[L(S), U(S)]})^{-1}(\alpha/2)$$

and

$$u_{\alpha/2}^S = q_{1-\alpha/2} = (F_{0, \sigma_S^2}^{[L(S), U(S)]})^{-1}(1 - \alpha/2),$$

respectively. From the above argument, there are no matter to compute the truncation points in Eqs.(15) based on the observations. In this case, Eqs.(15) can be written as

$$L(S) = \boldsymbol{\eta}^\top \mathbf{y} + \theta_L \sigma^2 (X_S^\top X_S)_{jj}^{-1}$$

where  $\theta_L = \min_{\theta \in \mathbb{R}} \theta$  s.t.  $\mathbf{y} + \theta \sigma^2 (X_S^+)^\top \mathbf{e}_j \in \text{Pol}(S)$

and

$$U(S) = \boldsymbol{\eta}^\top \mathbf{y} + \theta_U \sigma^2 (X_S^\top X_S)_{jj}^{-1}$$

where  $\theta_U = \max_{\theta \in \mathbb{R}} \theta$  s.t.  $\mathbf{y} + \theta \sigma^2 (X_S^+)^\top \mathbf{e}_j \in \text{Pol}(S)$ ,

respectively, but we can ignore the scaling factor  $\sigma^2$  because

$$\begin{aligned} & \min\{\theta \in \mathbb{R}^n \mid \mathbf{y} + \theta (X_S^+)^\top \mathbf{e}_j \in \text{Pol}(S)\} \\ & = \min\{\sigma^2 \theta \in \mathbb{R}^n \mid \mathbf{y} + \theta \sigma^2 (X_S^+)^\top \mathbf{e}_j \in \text{Pol}(S)\} \end{aligned}$$

and

$$\begin{aligned} & \max\{\theta \in \mathbb{R}^n \mid \mathbf{y} + \theta (X_S^+)^\top \mathbf{e}_j \in \text{Pol}(S)\} \\ & = \max\{\sigma^2 \theta \in \mathbb{R}^n \mid \mathbf{y} + \theta \sigma^2 (X_S^+)^\top \mathbf{e}_j \in \text{Pol}(S)\}. \end{aligned}$$

## A.2. Proof of Lemma 3

*Proof.* Since  $x_{ij} \in [0, 1]$ , for any pair  $(j, \tilde{j})$  such that  $\tilde{j} \in \text{Des}(j)$ ,  $x_j \geq x_{\tilde{j}}$  holds. Then,

$$\begin{aligned} |\mathbf{x}_{\tilde{j}}^\top \mathbf{y}| &= \left| \sum_{i: y_i > 0} x_{i\tilde{j}} y_i + \sum_{i: y_i < 0} x_{i\tilde{j}} y_i \right| \\ &\leq \max \left\{ \sum_{i: y_i > 0} x_{i\tilde{j}} y_i, - \sum_{i: y_i < 0} x_{i\tilde{j}} y_i \right\} \\ &\leq \max \left\{ \sum_{i: y_i > 0} x_{ij} y_i, - \sum_{i: y_i < 0} x_{ij} y_i \right\}. \end{aligned}$$

## A.3. Proof of Lemma 4

*Proof.* In MS, from Eq.(9), the constraint  $\mathbf{y} + \theta \boldsymbol{\eta} \in \text{Pol}(S)$  is written as

$$\begin{aligned} & (-s_j \mathbf{x}_{\cdot j} - \mathbf{x}_{\cdot j'})^\top (\mathbf{y} + \theta \boldsymbol{\eta}) \leq 0 \\ \Leftrightarrow & \frac{-(s_j \mathbf{x}_{\cdot j} + \mathbf{x}_{\cdot j'})^\top \mathbf{y}}{(s_j \mathbf{x}_{\cdot j} + \mathbf{x}_{\cdot j'})^\top \boldsymbol{\eta}} \leq \theta \text{ if } (s_j \mathbf{x}_{\cdot j} + \mathbf{x}_{\cdot j'})^\top \boldsymbol{\eta} > 0, \end{aligned} \quad (16a)$$

$$\text{and } \frac{-(s_j \mathbf{x}_{\cdot j} + \mathbf{x}_{\cdot j'})^\top \mathbf{y}}{(s_j \mathbf{x}_{\cdot j} + \mathbf{x}_{\cdot j'})^\top \boldsymbol{\eta}} \geq \theta \text{ if } (s_j \mathbf{x}_{\cdot j} + \mathbf{x}_{\cdot j'})^\top \boldsymbol{\eta} < 0. \quad (16b)$$

$$\begin{aligned} & (-s_j \mathbf{x}_{\cdot j} + \mathbf{x}_{\cdot j'})^\top (\mathbf{y} + \theta \boldsymbol{\eta}) \leq 0 \\ \Leftrightarrow & \frac{-(s_j \mathbf{x}_{\cdot j} - \mathbf{x}_{\cdot j'})^\top \mathbf{y}}{(s_j \mathbf{x}_{\cdot j} - \mathbf{x}_{\cdot j'})^\top \boldsymbol{\eta}} \leq \theta \text{ if } (s_j \mathbf{x}_{\cdot j} - \mathbf{x}_{\cdot j'})^\top \boldsymbol{\eta} > 0 \end{aligned} \quad (16c)$$

$$\text{and } \frac{-(s_j \mathbf{x}_{\cdot j} - \mathbf{x}_{\cdot j'})^\top \mathbf{y}}{(s_j \mathbf{x}_{\cdot j} - \mathbf{x}_{\cdot j'})^\top \boldsymbol{\eta}} \geq \theta \text{ if } (s_j \mathbf{x}_{\cdot j} - \mathbf{x}_{\cdot j'})^\top \boldsymbol{\eta} < 0. \quad (16d)$$

$$\begin{aligned} & -s_j \mathbf{x}_{\cdot j}^\top (\mathbf{y} + \theta \boldsymbol{\eta}) \leq 0 \\ \Leftrightarrow & \frac{-s_j \mathbf{x}_{\cdot j}^\top \mathbf{y}}{s_j \mathbf{x}_{\cdot j}^\top \boldsymbol{\eta}} \leq \theta \text{ if } s_j \mathbf{x}_{\cdot j}^\top \boldsymbol{\eta} > 0 \end{aligned} \quad (16e)$$

$$\text{and } \frac{-s_j \mathbf{x}_{\cdot j}^\top \mathbf{y}}{s_j \mathbf{x}_{\cdot j}^\top \boldsymbol{\eta}} \geq \theta \text{ if } s_j \mathbf{x}_{\cdot j}^\top \boldsymbol{\eta} < 0 \quad (16f)$$

for all  $(j, j') \in S \times \bar{S}$ . The conditions in Eqs.(16a), (16c), and (16e) suggests that  $-\theta_L$  must be at least smaller than  $\theta_L^{(a)}$  in Eq.(11a),  $\theta_L^{(b)}$  in Eq.(11c), and  $\theta_L^{(c)}$  in the second last inequality in Eq.(11), respectively. Therefore, we have

$$\theta_L = -\min\{\theta_L^{(a)}, \theta_L^{(b)}, \theta_L^{(c)}\}.$$

■ Similarly, the conditions in Eqs.(16b), (16d), and (16f) imply that

$$\theta_L = -\max\{\theta_U^{(a)}, \theta_U^{(b)}, \theta_U^{(c)}\}.$$

■

## A.4. Proof of Lemma 5

*Proof.* First, note that  $0 \leq x_{i\tilde{j}'} \leq x_{ij'} \leq 1$  for any  $(j, j', \tilde{j}') \in S \times \bar{S} \times \text{Des}_j(j')$ . We first prove Eq.(12a).

$$\begin{aligned} (s_j \mathbf{x}_{\cdot j} + \mathbf{x}_{\cdot \tilde{j}'} )^\top \mathbf{y} &= s_j \mathbf{x}_{\cdot j}^\top \mathbf{y} + \sum_{i: y_i > 0} x_{i\tilde{j}'} y_i + \sum_{i: y_i < 0} x_{i\tilde{j}'} y_i \\ &\geq s_j \mathbf{x}_{\cdot j}^\top \mathbf{y} + \sum_{i: y_i < 0} x_{i\tilde{j}'} y_i \\ &\geq s_j \mathbf{x}_{\cdot j}^\top \mathbf{y} + \sum_{i: y_i < 0} x_{ij'} y_i = L_E^{(a)}, \end{aligned}$$

■

which proves the first line. Next, we prove Eq.(12b).

$$\begin{aligned} (s_j \mathbf{x}_{\cdot j} + \mathbf{x}_{\cdot j'})^\top \mathbf{y} &= s_j \mathbf{x}_{\cdot j}^\top \mathbf{y} + \sum_{i:y_i>0} x_{i\tilde{j}'} y_i + \sum_{i:y_i<0} x_{i\tilde{j}'} y_i \\ &\leq s_j \mathbf{x}_{\cdot j}^\top \mathbf{y} + \sum_{i:y_i>0} x_{i\tilde{j}'} y_i. \\ &\leq s_j \mathbf{x}_{\cdot j}^\top \mathbf{y} + \sum_{i:y_i>0} x_{ij'} y_i = U_E^{(a)}, \end{aligned}$$

which proves the second line. Eqs. (12c) to (12h) are proved similarly. ■

### A.5. Proof of Theorem 6

*Proof.* First, we prove (i). For any  $(j, j', \tilde{j}') \in S \times \bar{S} \times Des_j(j')$ , by using Lemma 5 directly, a lower and an upper bound of  $s_j \mathbf{x}_{\cdot j}^\top \mathbf{y} + \mathbf{x}_{\cdot j'}^\top \mathbf{y}$  can be obtained as

$$L_E^{(a)} \leq s_j \mathbf{x}_{\cdot j}^\top \mathbf{y} + \mathbf{x}_{\cdot j'}^\top \mathbf{y} \leq U_E^{(a)} \quad (17)$$

Similarly, a lower and an upper bound of  $s_j \mathbf{x}_{\cdot j}^\top \boldsymbol{\eta} + \mathbf{x}_{\cdot j'}^\top \boldsymbol{\eta}$  can be also obtained as

$$L_D^{(a)} \leq s_j \mathbf{x}_{\cdot j}^\top \boldsymbol{\eta} + \mathbf{x}_{\cdot j'}^\top \boldsymbol{\eta} \leq U_D^{(a)} \quad (18)$$

From Eq.(18), we have

$$U_D^{(a)} < 0 \Rightarrow (s_j \mathbf{x}_{\cdot j} + \mathbf{x}_{\cdot j'})^\top \boldsymbol{\eta} < 0$$

for all  $(j, \tilde{j}') \in S \times Des_j(j')$ . It means that the  $(j, \tilde{j}')$ -th constraint does not affect the solution of the optimization problem in Eq.(11a). Now, we consider the case of  $U_D^{(a)} > 0$ . If  $L_D^{(a)} > 0$ , the value

$$\frac{(s_j \mathbf{x}_{\cdot j} + \mathbf{x}_{\cdot j'})^\top \mathbf{y}}{(s_j \mathbf{x}_{\cdot j} + \mathbf{x}_{\cdot j'})^\top \boldsymbol{\eta}}$$

can be bounded below by  $L_E^{(a)}/U_D^{(a)}$  when  $L_E^{(a)} > 0$ , and  $L_E^{(a)}/L_D^{(a)}$  when  $L_E^{(a)} < 0$ , while the value can take any small values if  $L_D^{(a)} < 0$ . As a result, for the current optimal solution  $\hat{\theta}_L^{(a)}$ ,  $(j, j')$ -th constraint does not affect the solution of the optimization problem Eq.(11a), if

$$L_D^{(a)} > 0, L_E^{(a)} > 0 \text{ and } \frac{L_E^{(a)}}{U_D^{(a)}} > \hat{\theta}_L^{(a)},$$

or

$$L_D^{(a)} > 0, L_E^{(a)} < 0 \text{ and } \frac{L_E^{(a)}}{L_D^{(a)}} > \hat{\theta}_L^{(a)},$$

because  $L_D^{(a)} > 0$  implies  $U_D^{(a)} > 0$ . Similarly, we can prove (ii) – (iv) by the same argument. ■

## B. Selective inference for OMP

**Lemma 8.** Let  $\boldsymbol{\eta} := (X^+)^T \mathbf{e}_j$ . The solutions of the optimization problems in (7) are respectively written as

$$\begin{aligned} \theta_L &= -\min\{\theta_L^{(a)}, \theta_L^{(b)}, \theta_L^{(c)}\}, \\ \theta_U &= -\max\{\theta_U^{(a)}, \theta_U^{(b)}, \theta_U^{(c)}\}, \end{aligned}$$

where

$$\theta_L^{(a)} := \min_{\substack{h \in [k], j' \in \bar{S}_h, \\ (s_{(h)} \mathbf{x}_{\cdot (h)} + \mathbf{x}_{\cdot j'})^\top P_{S_h} \boldsymbol{\eta} > 0}} \frac{(s_{(h)} \mathbf{x}_{\cdot (h)} + \mathbf{x}_{\cdot j'})^\top P_{S_h} \mathbf{y}}{(s_{(h)} \mathbf{x}_{\cdot (h)} + \mathbf{x}_{\cdot j'})^\top P_{S_h} \boldsymbol{\eta}}, \quad (19a)$$

$$\theta_L^{(b)} := \min_{\substack{h \in [k], j' \in \bar{S}_h, \\ (s_{(h)} \mathbf{x}_{\cdot (h)} - \mathbf{x}_{\cdot j'})^\top P_{S_h} \boldsymbol{\eta} > 0}} \frac{(s_{(h)} \mathbf{x}_{\cdot (h)} - \mathbf{x}_{\cdot j'})^\top P_{S_h} \mathbf{y}}{(s_{(h)} \mathbf{x}_{\cdot (h)} - \mathbf{x}_{\cdot j'})^\top P_{S_h} \boldsymbol{\eta}}, \quad (19b)$$

$$\theta_L^{(c)} := \min_{\substack{h \in [k], \\ s_{(h)} \mathbf{x}_{\cdot (h)}^\top P_{S_h} \boldsymbol{\eta} > 0}} \frac{s_{(h)} \mathbf{x}_{\cdot (h)}^\top P_{S_h} \mathbf{y}}{s_{(h)} \mathbf{x}_{\cdot (h)}^\top P_{S_h} \boldsymbol{\eta}}, \quad (19c)$$

$$\theta_U^{(a)} := \max_{\substack{h \in [k], j' \in \bar{S}_h, \\ (s_{(h)} \mathbf{x}_{\cdot (h)} + \mathbf{x}_{\cdot j'})^\top P_{S_h} \boldsymbol{\eta} < 0}} \frac{(s_{(h)} \mathbf{x}_{\cdot (h)} + \mathbf{x}_{\cdot j'})^\top P_{S_h} \mathbf{y}}{(s_{(h)} \mathbf{x}_{\cdot (h)} + \mathbf{x}_{\cdot j'})^\top P_{S_h} \boldsymbol{\eta}}, \quad (19d)$$

$$\theta_U^{(b)} := \max_{\substack{h \in [k], j' \in \bar{S}_h, \\ (s_{(h)} \mathbf{x}_{\cdot (h)} - \mathbf{x}_{\cdot j'})^\top P_{S_h} \boldsymbol{\eta} < 0}} \frac{(s_{(h)} \mathbf{x}_{\cdot (h)} - \mathbf{x}_{\cdot j'})^\top P_{S_h} \mathbf{y}}{(s_{(h)} \mathbf{x}_{\cdot (h)} - \mathbf{x}_{\cdot j'})^\top P_{S_h} \boldsymbol{\eta}}, \quad (19e)$$

$$\theta_U^{(c)} := \max_{\substack{h \in [k], \\ s_{(h)} \mathbf{x}_{\cdot (h)}^\top P_{S_h} \boldsymbol{\eta} < 0}} \frac{s_{(h)} \mathbf{x}_{\cdot (h)}^\top P_{S_h} \mathbf{y}}{s_{(h)} \mathbf{x}_{\cdot (h)}^\top P_{S_h} \boldsymbol{\eta}}. \quad (19f)$$

**Lemma 9.** For any  $h \in [k]$  and  $(j', \tilde{j}') \in \bar{S}_h \times \text{Des}_{(h)}(j')$ ,

$$\begin{aligned}
 L_E^{(a)} &:= s_{(h)} \mathbf{x}_{\cdot(h)}^\top P_{S_h} \mathbf{y} + \sum_{i: [P_{S_h} \mathbf{y}]_i < 0} x_{ij'} [P_{S_h} \mathbf{y}]_i \\
 &\leq (s_{(h)} \mathbf{x}_{\cdot(h)} + \mathbf{x}_{\cdot \tilde{j}'}^\top)^\top P_{S_h} \mathbf{y}, \\
 U_E^{(a)} &:= s_{(h)} \mathbf{x}_{\cdot(h)}^\top P_{S_h} \mathbf{y} + \sum_{i: [P_{S_h} \mathbf{y}]_i > 0} x_{ij'} [P_{S_h} \mathbf{y}]_i \\
 &\geq (s_{(h)} \mathbf{x}_{\cdot(h)} + \mathbf{x}_{\cdot \tilde{j}'}^\top)^\top P_{S_h} \mathbf{y}, \\
 L_D^{(a)} &:= s_{(h)} \mathbf{x}_{\cdot(h)}^\top \boldsymbol{\eta} + \sum_{i: [P_{S_h} \boldsymbol{\eta}]_i < 0} x_{ij'} [P_{S_h} \boldsymbol{\eta}]_i \\
 &\leq (s_{(h)} \mathbf{x}_{\cdot(h)} + \mathbf{x}_{\cdot \tilde{j}'}^\top)^\top P_{S_h} \boldsymbol{\eta}, \\
 U_D^{(a)} &:= s_{(h)} \mathbf{x}_{\cdot(h)}^\top \boldsymbol{\eta} + \sum_{i: [P_{S_h} \boldsymbol{\eta}]_i > 0} x_{ij'} [P_{S_h} \boldsymbol{\eta}]_i \\
 &\geq (s_{(h)} \mathbf{x}_{\cdot(h)} + \mathbf{x}_{\cdot \tilde{j}'}^\top)^\top P_{S_h} \boldsymbol{\eta}, \\
 L_E^{(b)} &:= s_{(h)} \mathbf{x}_{\cdot(h)}^\top P_{S_h} \mathbf{y} - \sum_{i: [P_{S_h} \mathbf{y}]_i > 0} x_{ij'} [P_{S_h} \mathbf{y}]_i \\
 &\leq (s_{(h)} \mathbf{x}_{\cdot(h)} - \mathbf{x}_{\cdot \tilde{j}'}^\top)^\top P_{S_h} \mathbf{y}, \\
 U_E^{(b)} &:= s_{(h)} \mathbf{x}_{\cdot(h)}^\top P_{S_h} \mathbf{y} - \sum_{i: [P_{S_h} \mathbf{y}]_i < 0} x_{ij'} [P_{S_h} \mathbf{y}]_i \\
 &\geq (s_{(h)} \mathbf{x}_{\cdot(h)} - \mathbf{x}_{\cdot \tilde{j}'}^\top)^\top P_{S_h} \mathbf{y}, \\
 L_D^{(b)} &:= s_{(h)} \mathbf{x}_{\cdot(h)}^\top \boldsymbol{\eta} - \sum_{i: [P_{S_h} \boldsymbol{\eta}]_i > 0} x_{ij'} [P_{S_h} \boldsymbol{\eta}]_i \\
 &\leq (s_{(h)} \mathbf{x}_{\cdot(h)} - \mathbf{x}_{\cdot \tilde{j}'}^\top)^\top P_{S_h} \boldsymbol{\eta}, \\
 U_D^{(b)} &:= s_{(h)} \mathbf{x}_{\cdot(h)}^\top \boldsymbol{\eta} - \sum_{i: [P_{S_h} \boldsymbol{\eta}]_i < 0} x_{ij'} [P_{S_h} \boldsymbol{\eta}]_i \\
 &\geq (s_{(h)} \mathbf{x}_{\cdot(h)} - \mathbf{x}_{\cdot \tilde{j}'}^\top)^\top P_{S_h} \boldsymbol{\eta}.
 \end{aligned}$$

**Theorem 10.** (i) Consider solving the optimization problem in Eq.(19a), and let  $\hat{\theta}_L^{(a)}$  be the current optimal solution, i.e., we know that the optimal  $\theta_L^{(a)}$  is at least no greater than  $\hat{\theta}_L^{(a)}$ . If

$$\begin{aligned}
 \{U_D^{(a)} < 0\} \cup \{L_D^{(a)} > 0, L_E^{(a)} < 0, L_E^{(a)} / L_D^{(a)} > \hat{\theta}_L^{(a)}\} \\
 \cup \{L_D^{(a)} > 0, L_E^{(a)} > 0, L_E^{(a)} / U_D^{(a)} > \hat{\theta}_L^{(a)}\}
 \end{aligned}$$

is true, then the  $\tilde{j}'$ -th constraint in Eq. (10a) for any  $h \in [k]$  and  $(j', \tilde{j}') \in \bar{S}_h \times \text{Des}_{(h)}(j')$  does not affect the optimal solution in Eq.(19a).

(ii) Next, consider solving the optimization problem in Eq.(19b), and let  $\hat{\theta}_L^{(b)}$  be the current optimal solution. If

$$\begin{aligned}
 \{U_D^{(b)} < 0\} \cup \{L_D^{(b)} > 0, L_E^{(b)} < 0, L_E^{(b)} / L_D^{(b)} < \hat{\theta}_L^{(b)}\} \\
 \cup \{L_D^{(b)} > 0, L_E^{(b)} > 0, L_E^{(b)} / U_D^{(b)} < \hat{\theta}_L^{(b)}\}
 \end{aligned}$$

is true, then the  $\tilde{j}'$ -th constraint in Eq. (10b) for any  $h \in [k]$  and  $(j', \tilde{j}') \in \bar{S}_h \times \text{Des}_{(h)}(j')$  does not affect the optimal solution in Eq.(19b).

(iii) Furthermore, consider solving the optimization problem in Eq.(19d), and let  $\hat{\theta}_U^{(a)}$  be the current optimal solution. If

$$\begin{aligned}
 \{L_D^{(a)} > 0\} \cup \{U_D^{(a)} < 0, L_E^{(a)} < 0, L_E^{(a)} / U_D^{(a)} > \hat{\theta}_U^{(a)}\} \\
 \cup \{U_D^{(a)} < 0, L_E^{(a)} > 0, L_E^{(a)} / L_D^{(a)} > \hat{\theta}_U^{(a)}\}
 \end{aligned}$$

is true, then the  $\tilde{j}'$ -th constraint in Eq. (10a) for any  $h \in [k]$  and  $(j', \tilde{j}') \in \bar{S}_h \times \text{Des}_{(h)}(j')$  does not affect the optimal solution in Eq.(19d).

(iv) Finally, consider solving the optimization problem in Eq.(19e), and let  $\hat{\theta}_U^{(b)}$  be the current optimal solution. If

$$\begin{aligned}
 \{L_D^{(b)} > 0\} \cup \{U_D^{(b)} < 0, L_E^{(b)} < 0, L_E^{(b)} / U_D^{(b)} > \hat{\theta}_U^{(b)}\} \\
 \cup \{U_D^{(b)} < 0, L_E^{(b)} > 0, L_E^{(b)} / L_D^{(b)} > \hat{\theta}_U^{(b)}\}
 \end{aligned}$$

is true, then the  $\tilde{j}'$ -th constraint in Eq. (10b) for any  $h \in [k]$  and  $(j', \tilde{j}') \in \bar{S}_h \times \text{Des}_{(h)}(j')$  does not affect the optimal solution in Eq.(19e).
